# Supplementary material for: Prosthetic Joint Infection After Dental Work: Is the Correct Prophylaxis Being Prescribed? A Systematic Review
Source: PubMed Central journal article supplement — Arthroplast Today. 2021 Jan 9;7:69–75. doi: 10.1016/j.artd.2020.11.007 (PMC7818599; doi:10.1016/j.artd.2020.11.007), 2021-01-09
Supplement: mmc4.pdf [file mmc4.pdf]

# INDIVIDUAL CONFLICT OF INTEREST STATEMENT

## *American Association of Hip and Knee Surgeons*

(Adopted from the American Academy of Orthopaedic Surgeons disclosure statement)

The following form **must be filled out completely and submitted by each author (example, 6 authors, 6 forms).**  
**All items require a response. If there is no relevant disclosure for a given item, enter "None."**

### **Prosthetic Joint Infection after Dental Work: Is the Correct Prophylaxis Being Prescribed?**

#### **A systematic review**

---

#### **Manuscript Title**

1. Royalties from a company or supplier: NONE
  
2. Speakers bureau/paid presentations for a company: NONE
  
- 3A. Paid employee for a company or supplier: NONE
  
- 3B. Paid consultant for a company: NONE
  
- 3C. Unpaid consultants for a company or supplier: NONE
  
4. Stock or stock options in a company or supplier: NONE
  
5. Research support from a company or supplier as a Principal Investigator: NONE
  
6. Other financial or material support from a company or supplier: NONE
  
7. Royalties, financial or material support from publishers: NONE
  
8. Medical/Orthopaedic publications editorial/governing board: NONE
  
9. Board member/committee appointments for a society: NONE

Richard Danilkowicz



5/13/20

---

Author Name (Print or Type)

Author Signature

Date
